# Supplementary material for: Negatively chirped, self-compressing supercontinuum generation by ghost pulses
Source: Research Square preprint supplement (doi:10.21203/rs.3.rs-3925197/v1), 2024-04-09

### Carrier pulse generation:

Changes of autocorrelation curve width after pulse shaping in the 4f-line system (left). The red dots denote the measured data. The solid blue lines represent the Gaussian fitting curves. XFROG result reveals that the pulse duration of the long carrier pulse produced by the 4f-line is about 2.1 ps (right). The red dots denote the measured data. The solid blue lines represent the Gaussian fitting curves. Numbers present the extracted pulse duration.

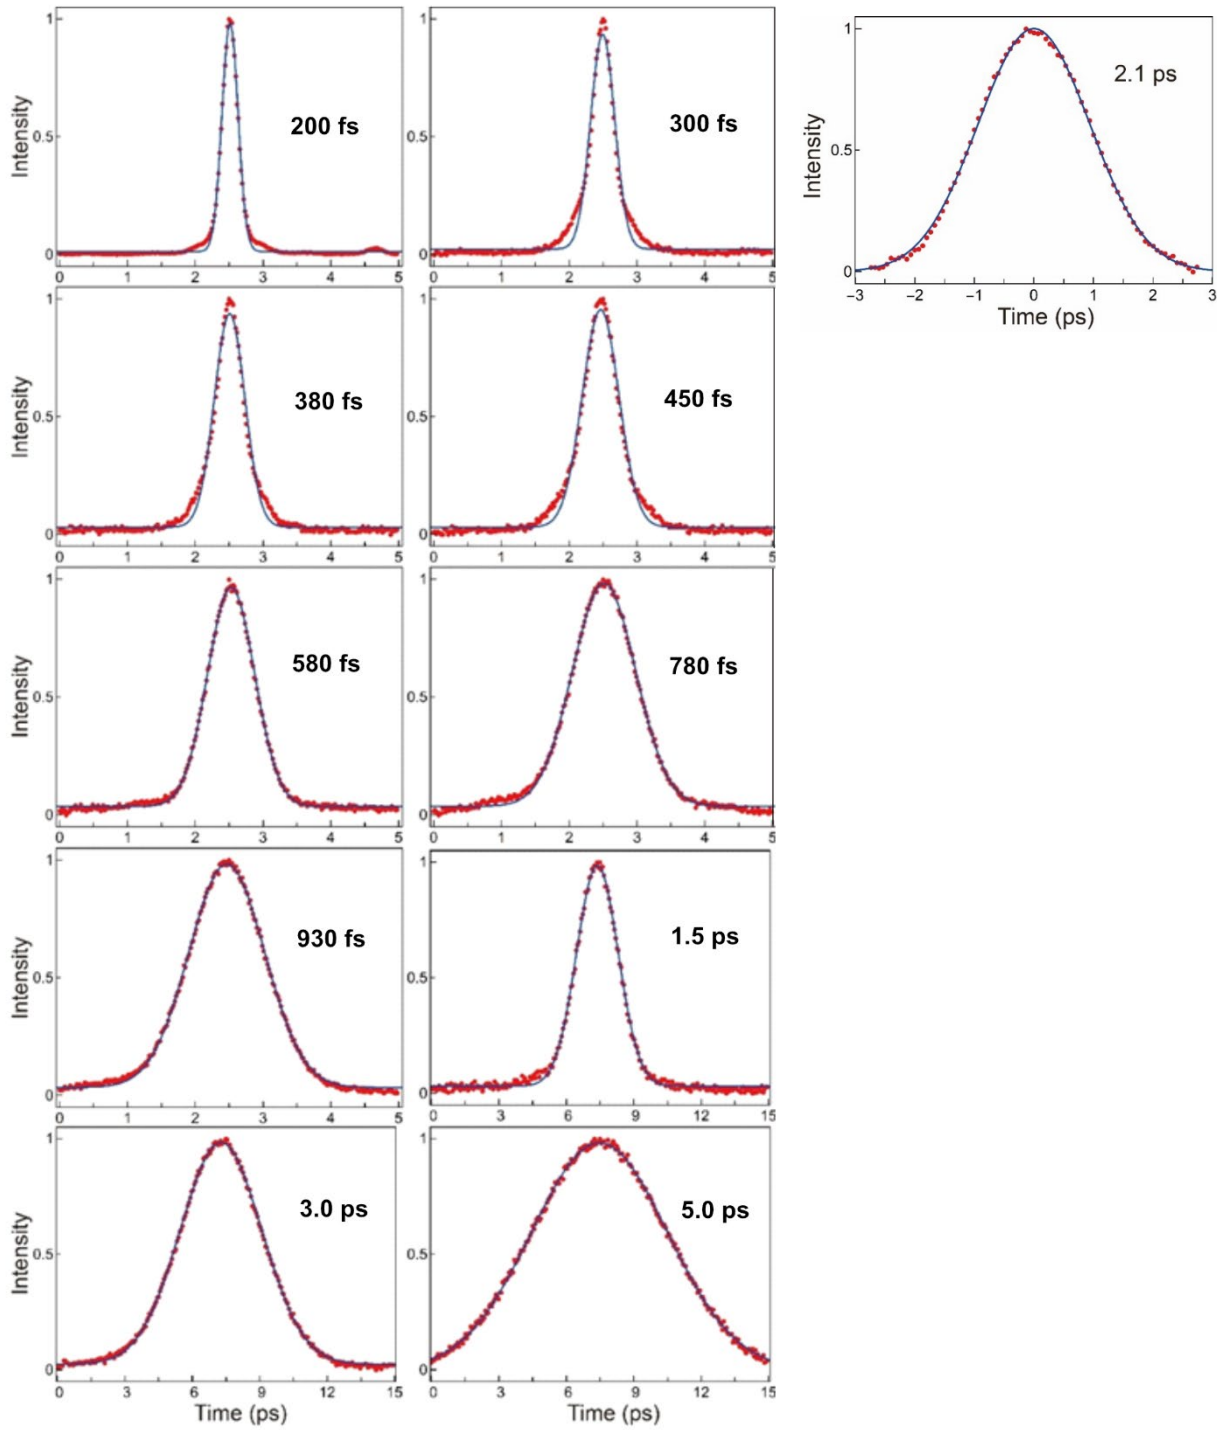

Supplement: Supplementary file 3 [file adc8fd8436803c64d0117c1c.pdf]
